# Supplementary material for: Cuproptosis-related gene index: A predictor for pancreatic cancer prognosis, immunotherapy efficacy, and chemosensitivity
Source: PubMed Central journal article supplement (PMC9453428; doi:10.3389/fimmu.2022.978865), 2022-08-25
Supplement: Image_1.pdf [file Image_1.pdf]

Kruskal-Wallis test p=0.18

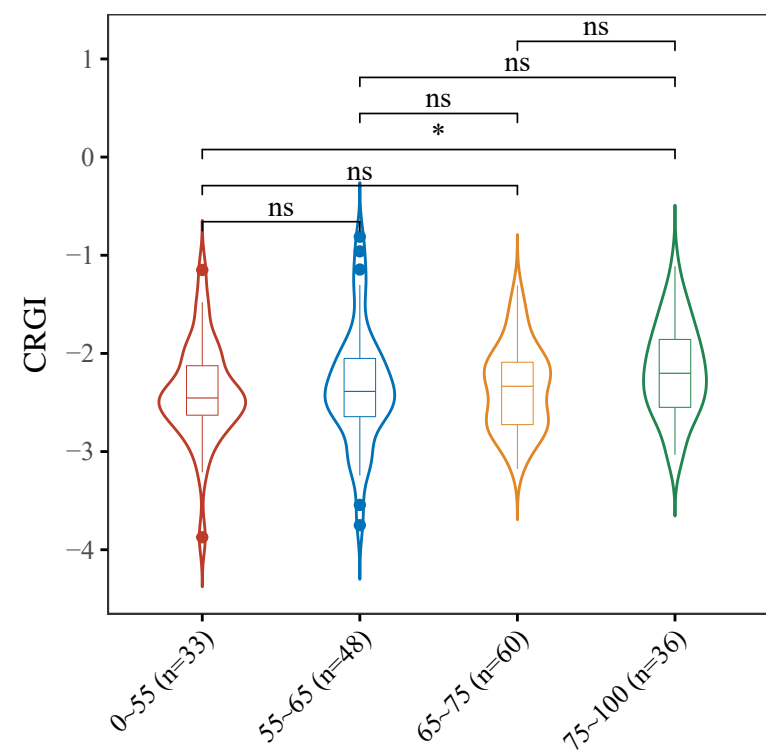

wilcox.tests p=0.9

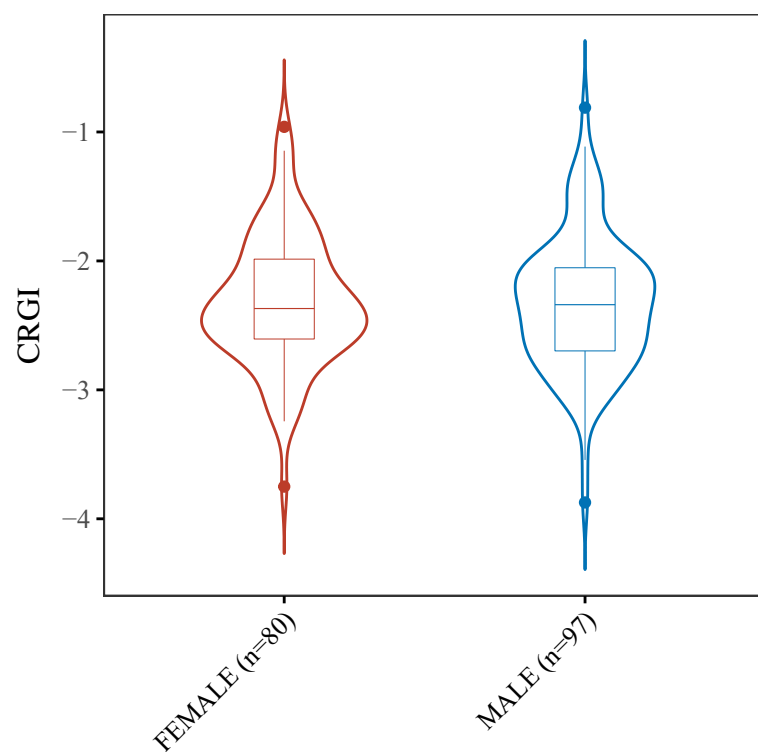

Kruskal-Wallis test p=0.83

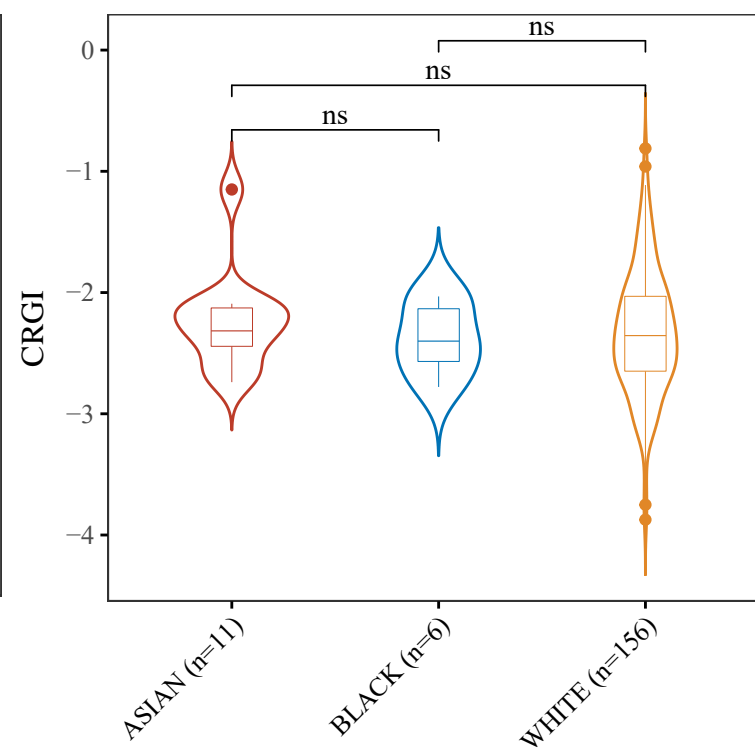

Kruskal-Wallis test p=0.14

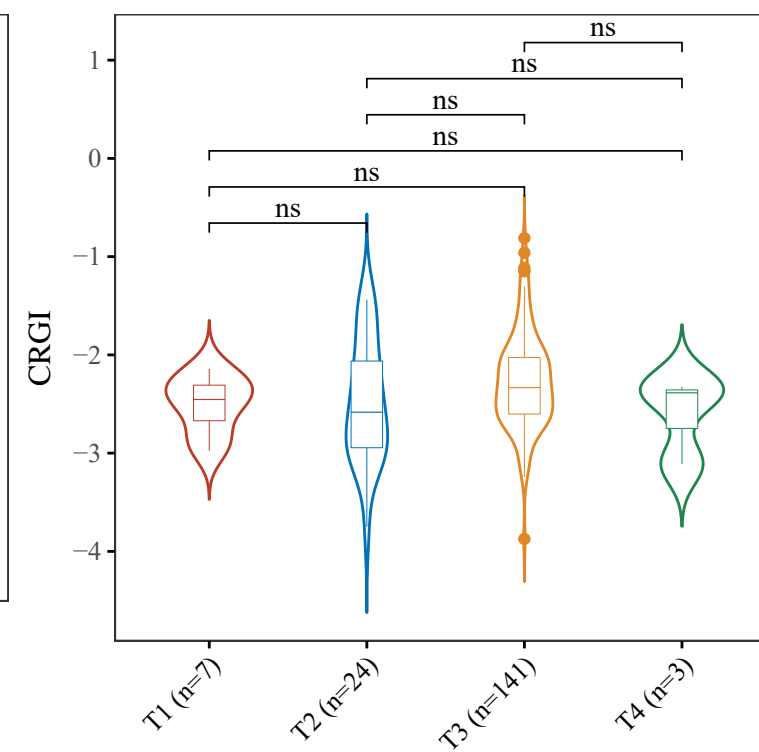

Kruskal-Wallis test p=0.36

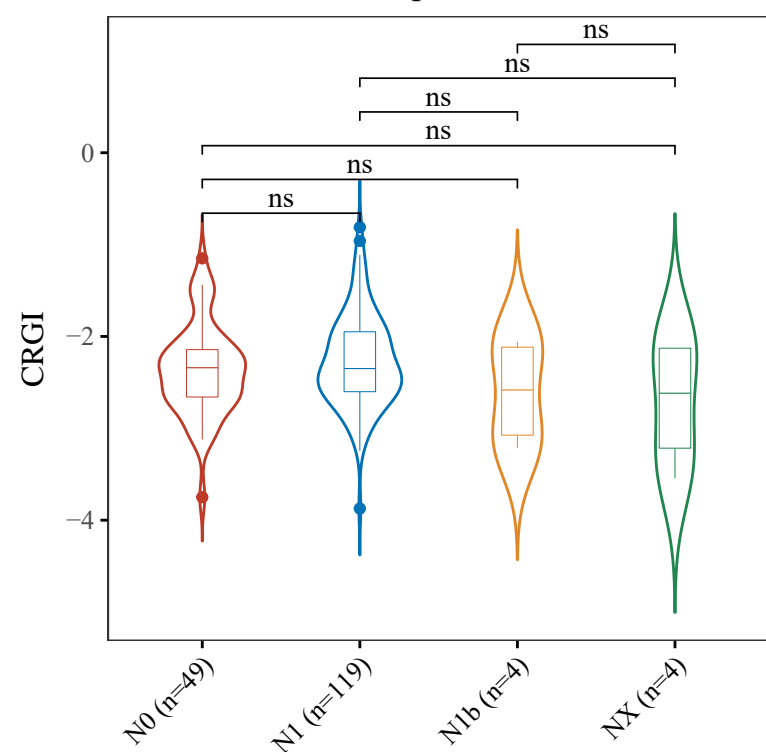

Kruskal-Wallis test p=0.35

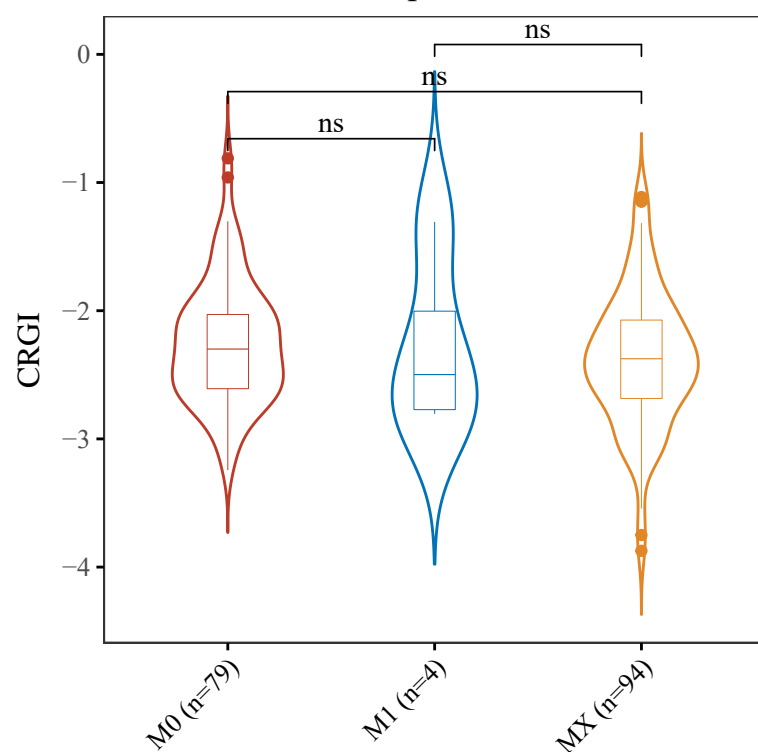

Kruskal-Wallis test p=0.21

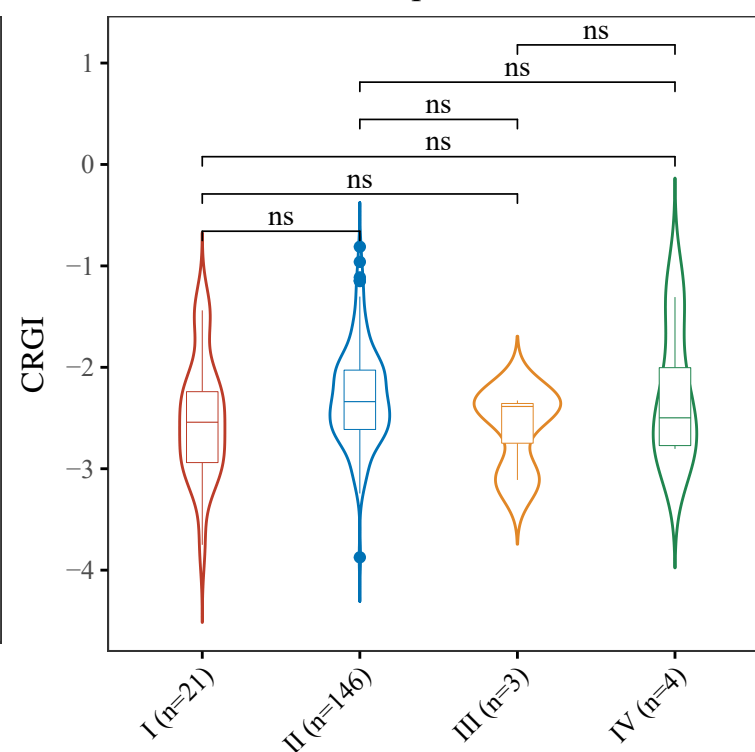

Kruskal-Wallis test p=0.028

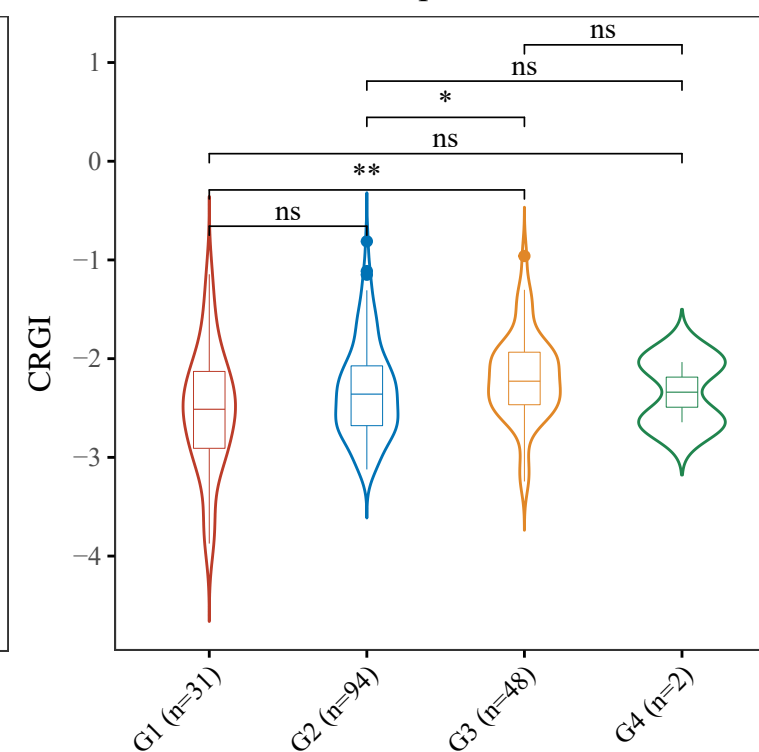

Kruskal-Wallis test p=0.19

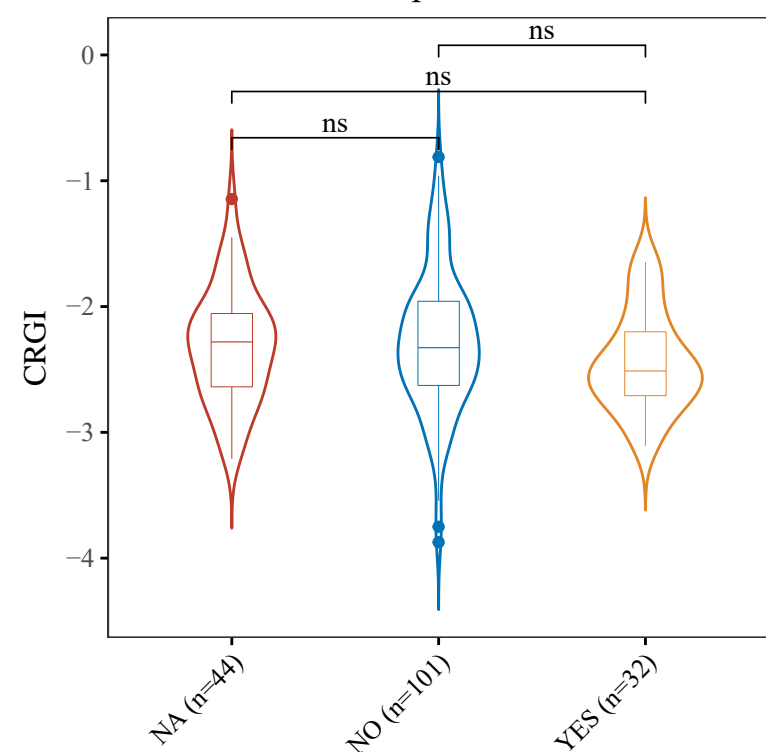

wilcox.tests p=0.59

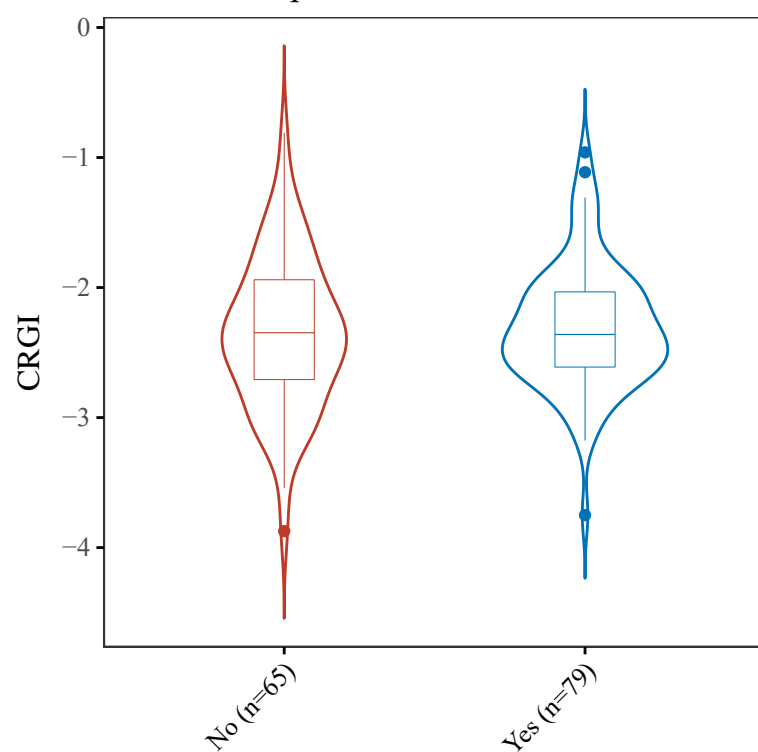

wilcox.tests p=0.35

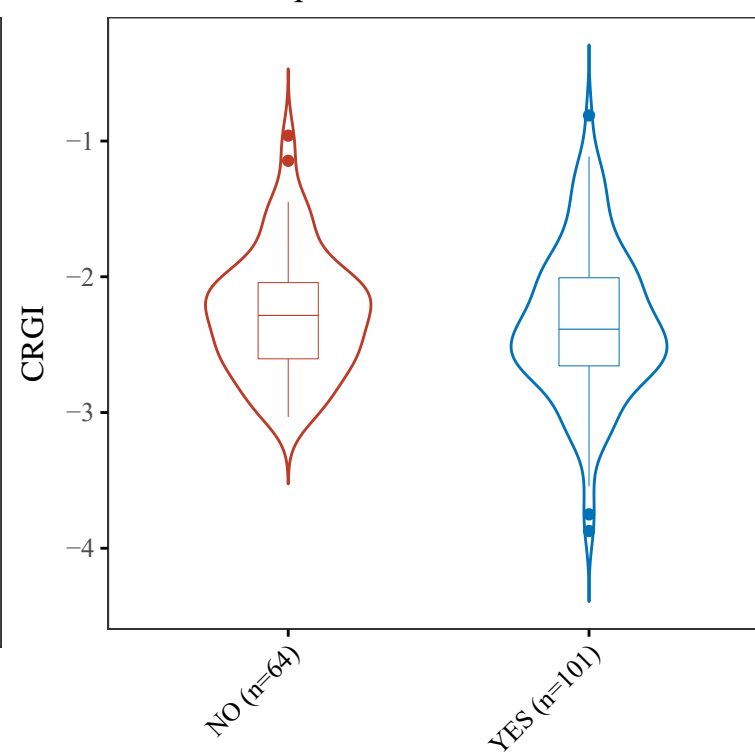

S1\_Correlation between CRGI and clinical factors.
