# Supplementary material for: Cuproptosis-related gene index: A predictor for pancreatic cancer prognosis, immunotherapy efficacy, and chemosensitivity
Source: PubMed Central journal article supplement (PMC9453428; doi:10.3389/fimmu.2022.978865), 2022-08-25
Supplement: Image_3.pdf [file Image_3.pdf]

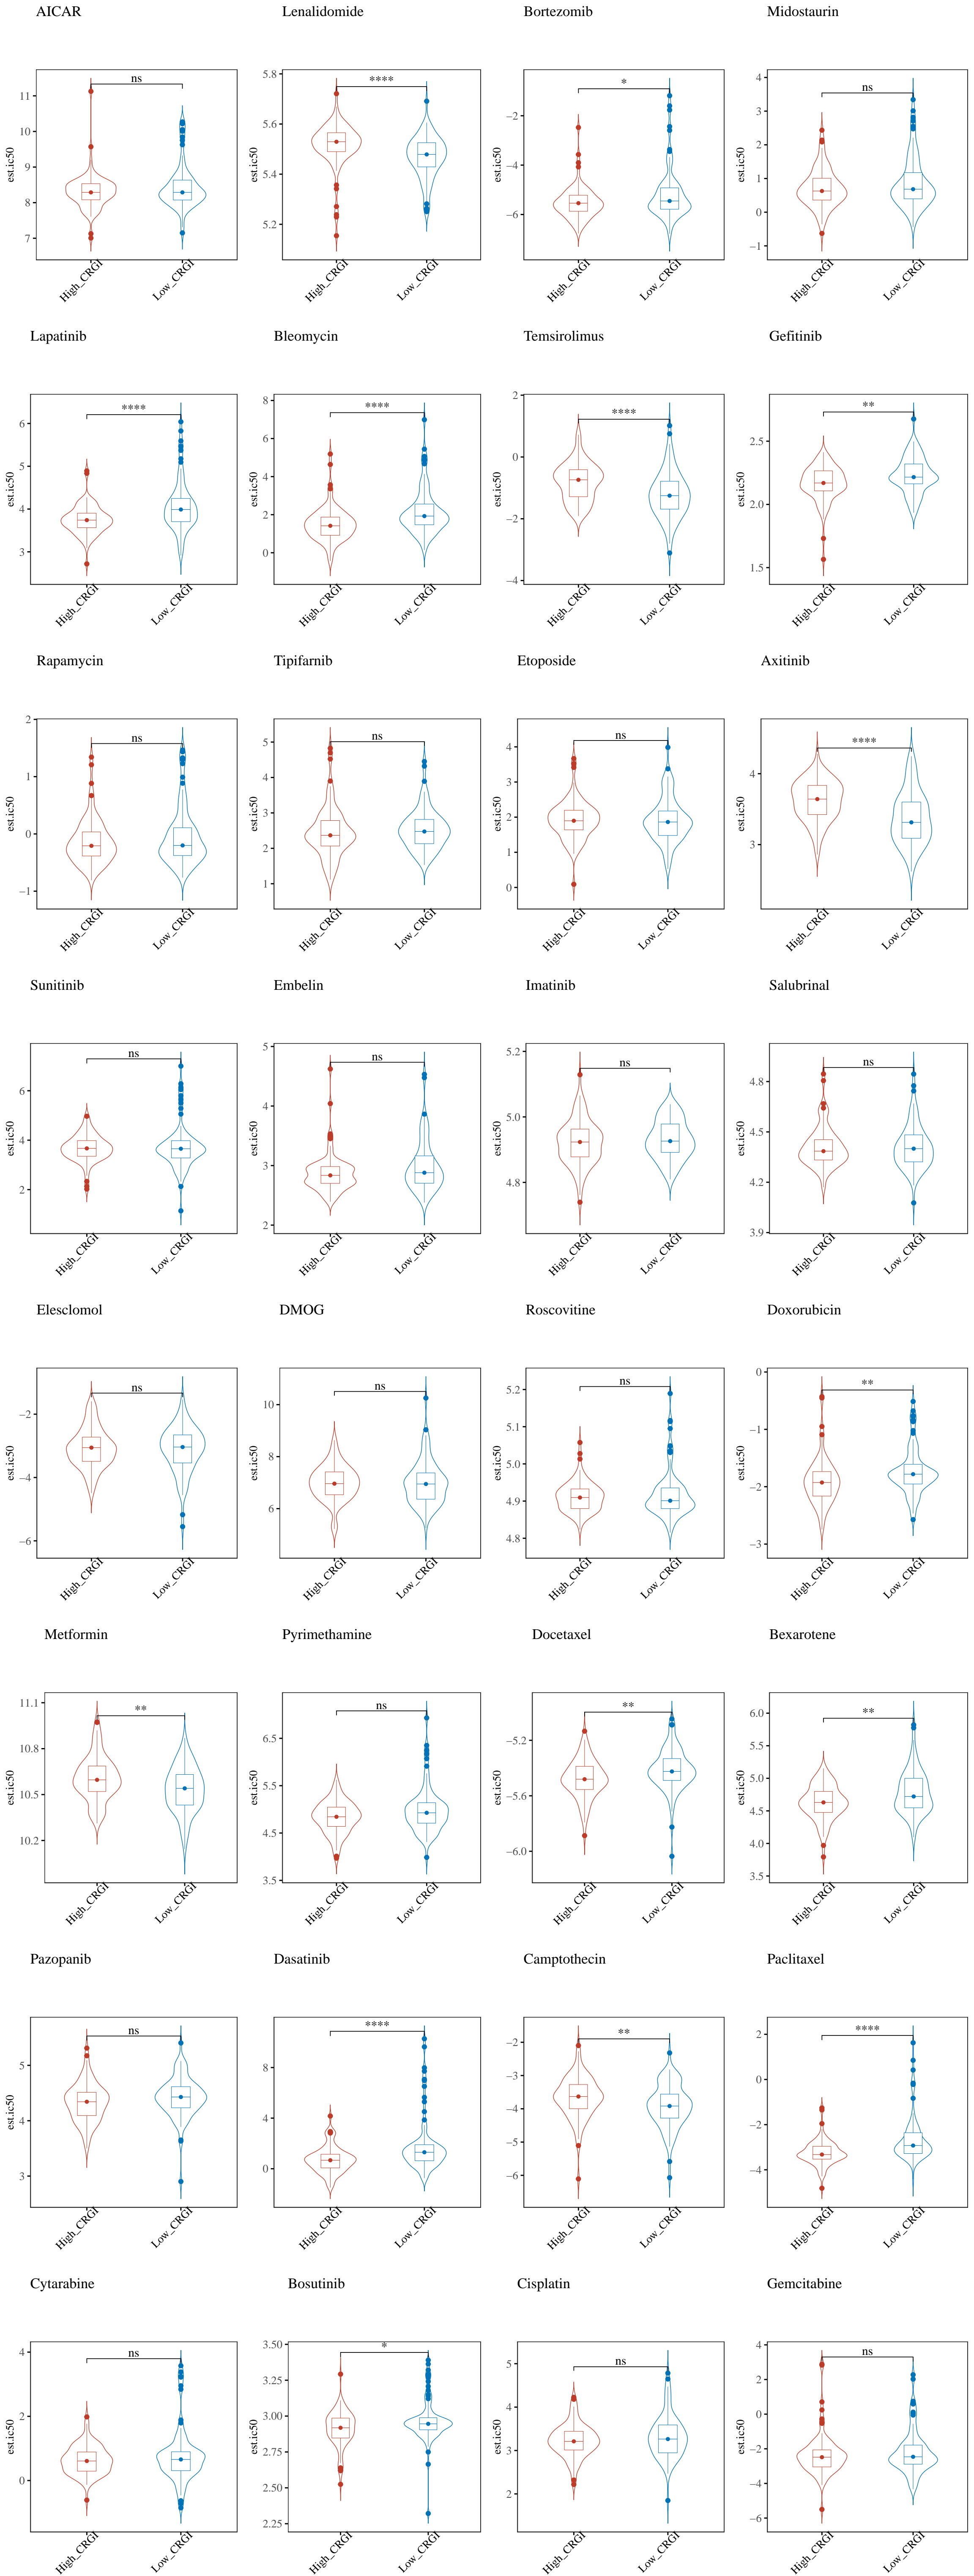

S3\_Comparison of the efficacy of 32 anti-cancer drugs in high- and low-CRGI groups.
