# Supplementary material for: Cuproptosis-related gene index: A predictor for pancreatic cancer prognosis, immunotherapy efficacy, and chemosensitivity
Source: PubMed Central journal article supplement (PMC9453428; doi:10.3389/fimmu.2022.978865), 2022-08-25
Supplement: Image_6.pdf [file Image_6.pdf]

Actin

DLAT

LIPT1

LIAS

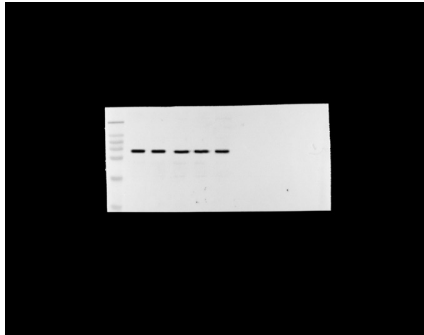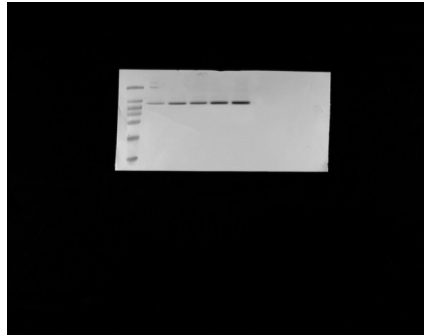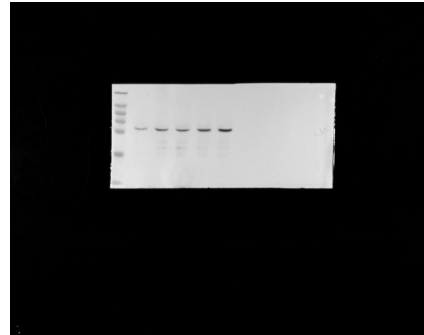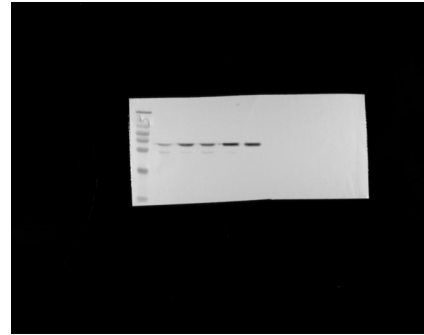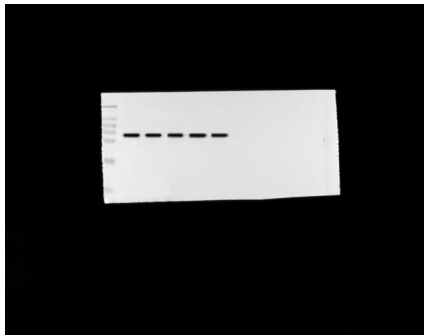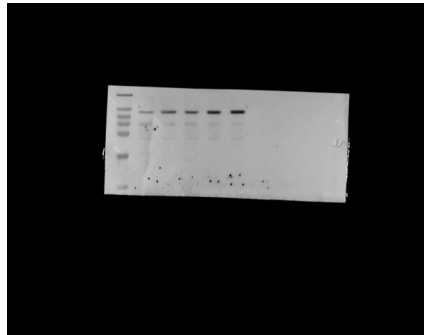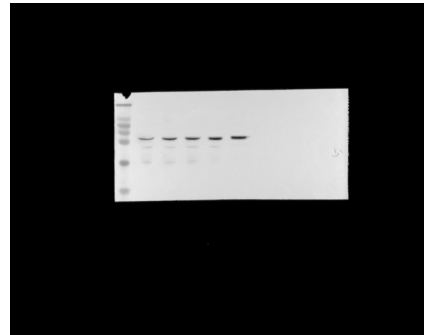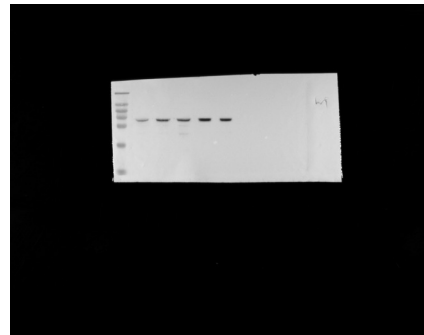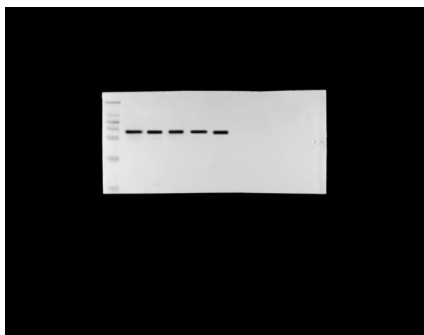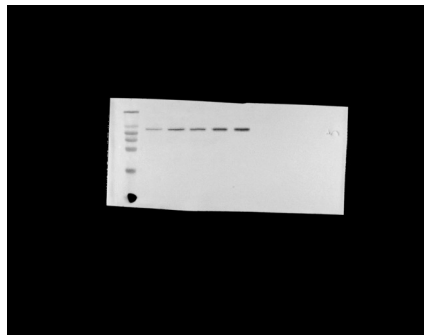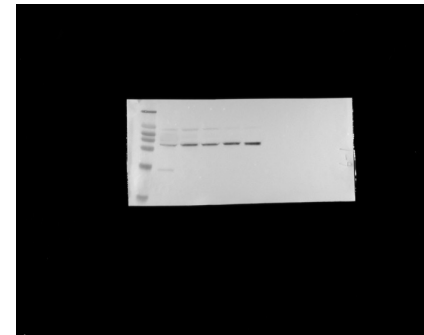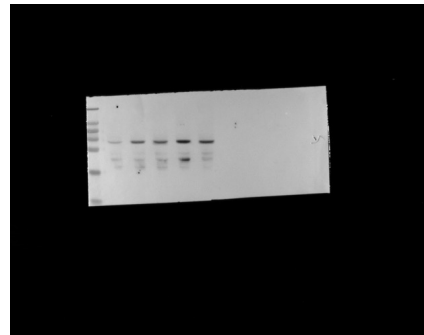

S6\_Western blot original result
