# Supplementary material for: Cuproptosis-related gene index: A predictor for pancreatic cancer prognosis, immunotherapy efficacy, and chemosensitivity
Source: PubMed Central journal article supplement (PMC9453428; doi:10.3389/fimmu.2022.978865), 2022-08-25
Supplement: Table_1.pdf [file Table_1.pdf]

| Target Name | Primer |                         |
|-------------|--------|-------------------------|
| Actin       | F      | TCCTCCTGAGCGCAAGTACTCC  |
|             | R      | CATACTCCTGCTTGCTGATCCAC |
| LIAS        | F      | CTGAACACATTGCAAAGACCG   |
|             | R      | CATGTTTCAGTACACGTAGGGAC |
| LIPT1       | F      | CATATGAATCTAGAAGGCAAACC |
|             | R      | TCCTCCAATTCTTCTCCGA     |
| DLAT        | F      | ACTCCCCAGCCTTTAGCTC     |
|             | R      | CAATCCCTTTCTCTACTGCCAAC |

T1\_Primer sequences for RT-qPCR.
