# Supplementary material for: Cuproptosis-related gene index: A predictor for pancreatic cancer prognosis, immunotherapy efficacy, and chemosensitivity
Source: PubMed Central journal article supplement (PMC9453428; doi:10.3389/fimmu.2022.978865), 2022-08-25
Supplement: Table_2.pdf [file Table_2.pdf]

| Target Name | Antibody Name                 | Antibody Molecular Weight | Source Company |
|-------------|-------------------------------|---------------------------|----------------|
| Actin       | [mAbcam 8226] - (ab8226)      | 43kDa                     | Abcam          |
| LIAS        | (ab246917)                    | 42kDa                     | Abcam          |
| LIPT1       | (bs-18298R)                   | 38kDa                     | Bioss Antibody |
| DLAT        | (4A4-B6-C10) Mouse mAb #12362 | 63kDa                     | CST            |

T2\_Antibody information
